# Supplementary material for: Near-infrared optical performances of two Bi2Se3nanosheets
Source: Royal Society of Chemistry journal article supplement (doi:10.1039/c7ra09872c), 2017-01-01
Supplement: c7ra09872c1.pdf [file c7ra09872c1.pdf]

Electronic Supplementary Information (ESI)

**Near-infrared optical performances of two Bi<sub>2</sub>Se<sub>3</sub> nanosheets**

Hanhan Xie<sup>a</sup>, Jundong Shao<sup>b</sup>, Jiahong Wang<sup>\*b</sup>, Zhengbo Sun<sup>b</sup>, Xue-Feng Yu<sup>\*b</sup> and Qu-Quan Wang<sup>\*a</sup>

*<sup>a</sup>Department of Physics, Key Laboratory of Artificial Micro- and Nano-structures of Ministry of Education and School of Physics and Technology, Wuhan University, Wuhan 430072, China. E-mail: [qqwang@whu.edu.cn](mailto:qqwang@whu.edu.cn)*

*<sup>b</sup>Institute of Biomedicine and Biotechnology, Shenzhen Institutes of Advanced Technology, Chinese Academy of Sciences, Shenzhen 518055, P. R. China  
E-mails: [xf.yu@siat.ac.cn](mailto:xf.yu@siat.ac.cn), [jh.wang1@siat.ac.cn](mailto:jh.wang1@siat.ac.cn)*

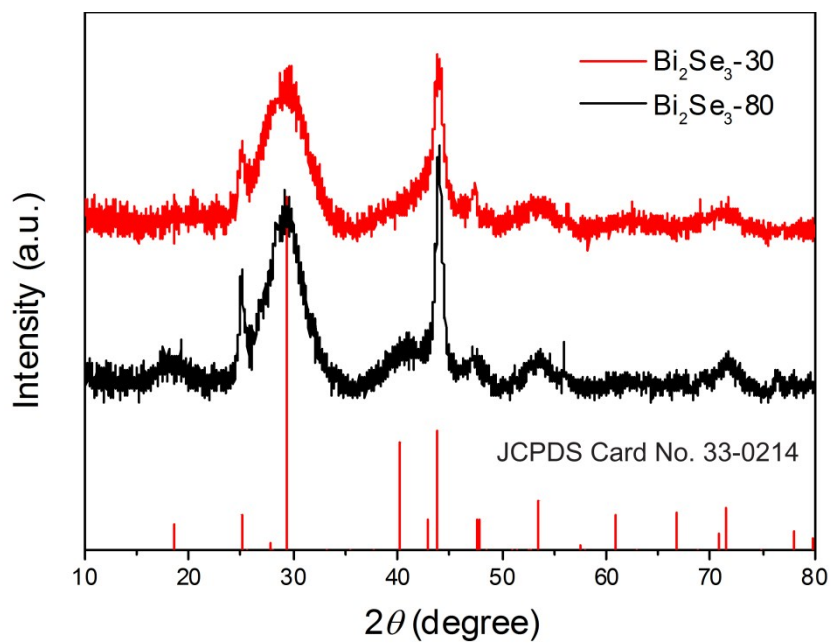

Fig. S1. XRD patterns of the two  $\text{Bi}_2\text{Se}_3$  nanosheets.

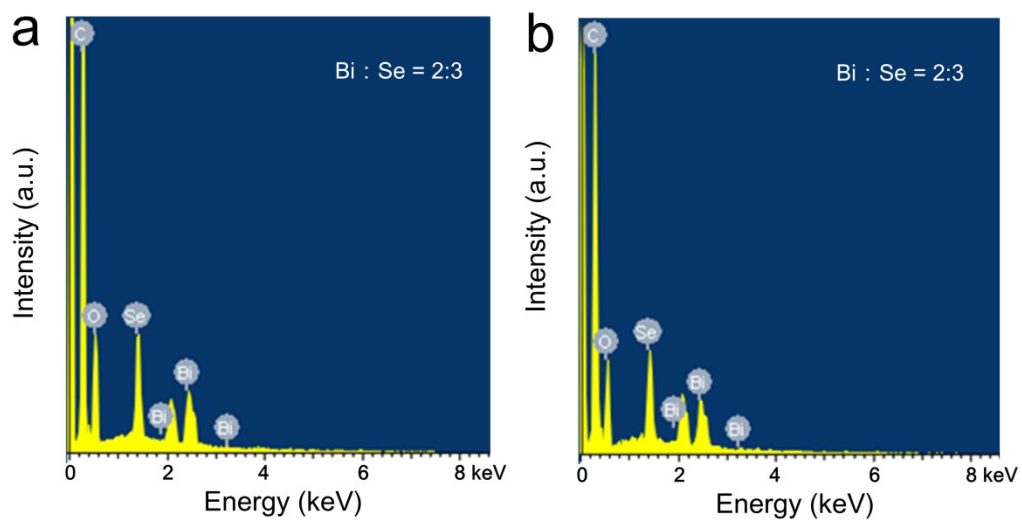

Fig. S2. EDS spectra of (a) Bi<sub>2</sub>Se<sub>3</sub>-30 and (b) Bi<sub>2</sub>Se<sub>3</sub>-80 nanosheets.

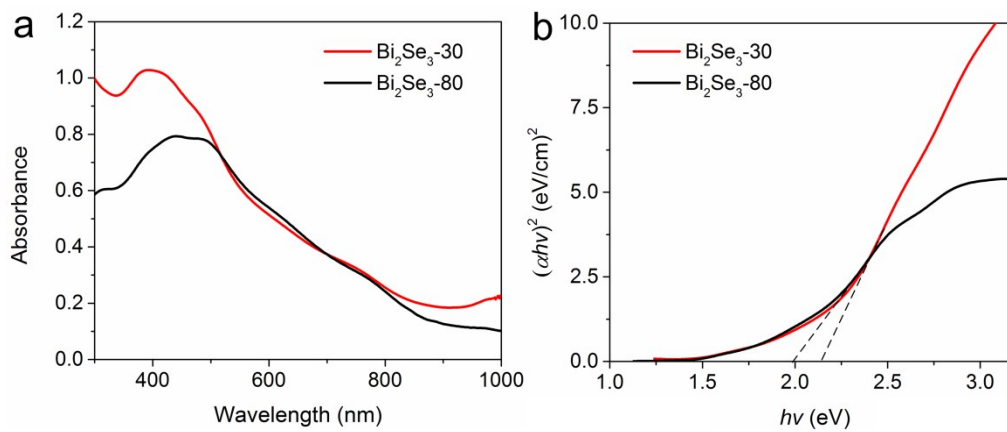

Fig. S3. (a) Absorption spectra of the two Bi<sub>2</sub>Se<sub>3</sub> nanosheets. (b) Plots of  $(\alpha hv)^2$  vs.  $hv$  of the two Bi<sub>2</sub>Se<sub>3</sub> nanosheets.

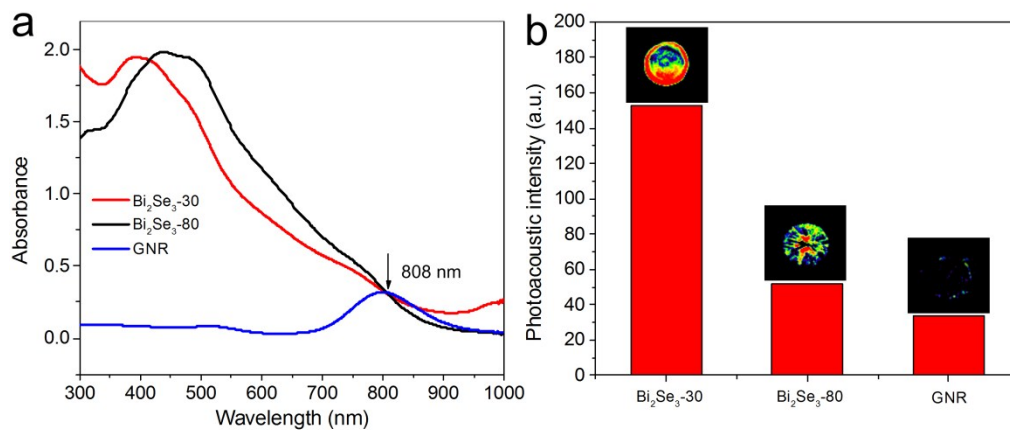

Fig. S4. (a) Absorption spectra of the two Bi<sub>2</sub>Se<sub>3</sub> nanosheets and GNRs with same intensities at 808 nm. (b) Corresponding photoacoustic images and quantitative intensities of the two Bi<sub>2</sub>Se<sub>3</sub> nanosheets and GNRs.
